1 Title: Long-term research needed to avoid spurious and misleading trends in sustainability attributes of no-till

2

3 Sarah Cusser<sup>1</sup>, Christie Bahlai<sup>1,2</sup>, Scott M. Swinton<sup>3</sup>, G. Philip Robertson<sup>1,4,5</sup>, and Nick M. Haddad<sup>1</sup>

4

5

6 1 W.K. Kellogg Biological Station, Department of Integrative Biology, Michigan State University, 3700 East Gull

7 Lake Dr., Hickory Corners, MI 49060, U.S.

8

9 2 Department of Biological Science, Kent State University, 249 Cunningham Hall, Kent, OH

10 44240, U.S.

11

12 3 Department of Agricultural, Food, and Resource Economics, Michigan State University, East Lansing, MI 48824,

13 U.S.

14

15 4 Great Lakes Bioenergy Research Center, Michigan State University, East Lansing, MI 48824, U.S.

16

17 5 Department of Plant, Soil, and Microbial Sciences, Michigan State University, East Lansing, MI 48824, U.S.

18

19

20

21

22

23

24

25

26

27

28

29

30 GRAPHICAL ABSTRACT

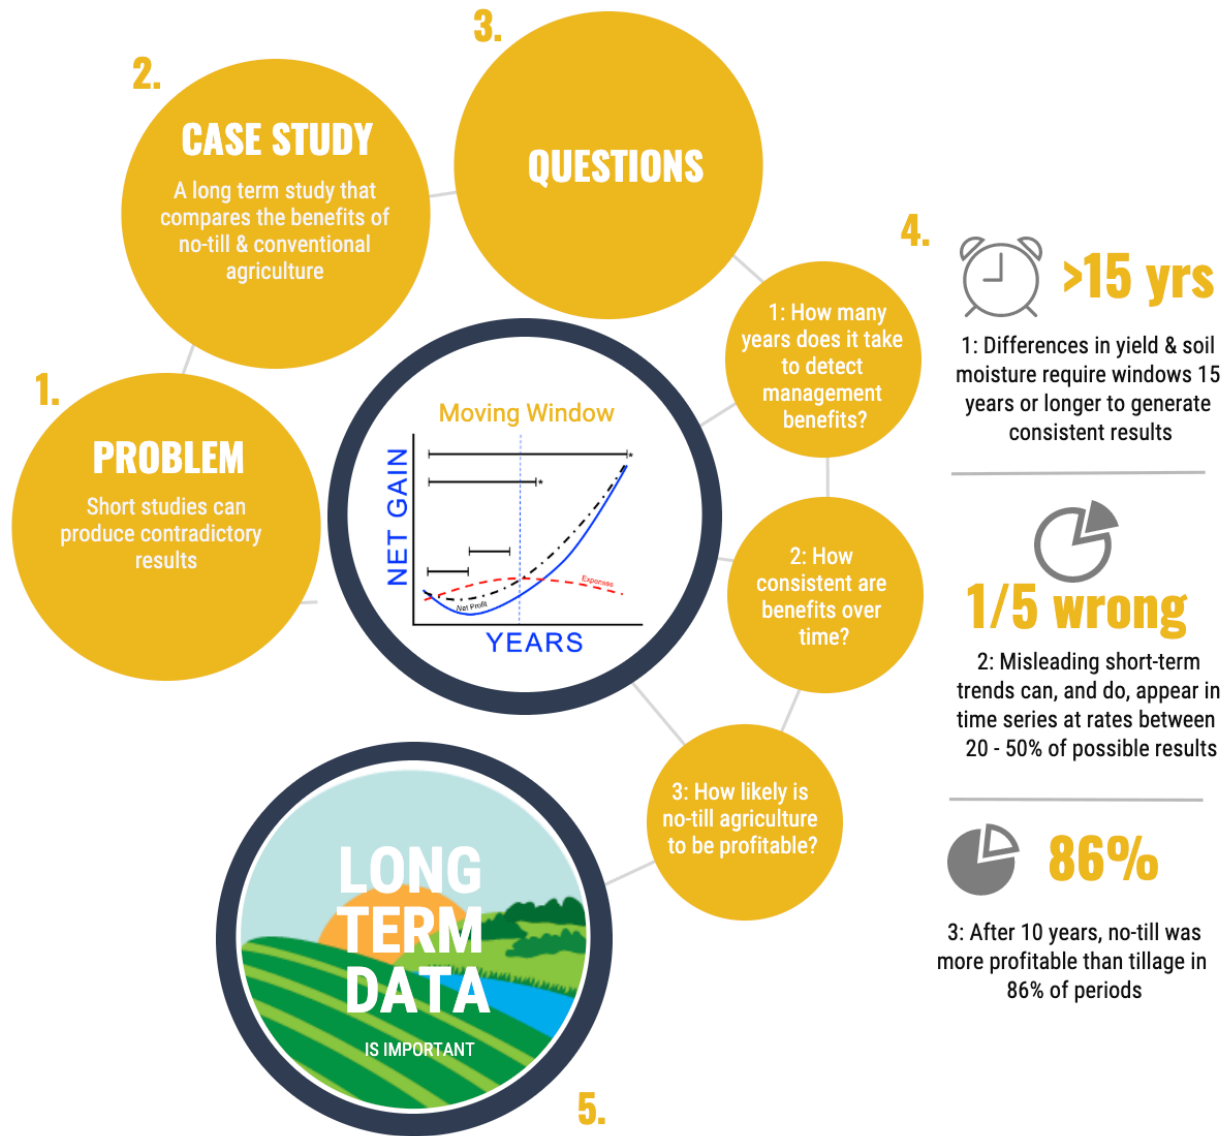

31  
32  
33  
34  
35  
36  
37  
38  
39

40 **ABSTRACT**

41       Agricultural management recommendations based on short-term studies can produce findings inconsistent with  
42 long-term reality. Here, we test the long-term relative profitability and environmental sustainability of continuous  
43 no-till agriculture practices on crop yield, soil moisture, and N<sub>2</sub>O fluxes. Using a moving window approach, we  
44 investigate the development and stability of several attributes of continuous no-till as compared to conventional till  
45 agriculture over a 29-year period at a site in the upper Midwest, U.S. We find that over a decade is needed to detect  
46 the consistent benefits of no-till on important attributes at this site. Both crop yield and soil moisture required  
47 periods 15 years or longer to generate patterns consistent with 29-year trends. Only marginally significant trends for  
48 N<sub>2</sub>O fluxes appeared in this period. Importantly, significant but misleading short-term trends appeared in more than  
49 20% of the periods examined. Relative profitability analysis suggests that 10 years after initial implementation, 86%  
50 of periods recuperated the initial expense of no-till implementation, with the probability of higher relative profit  
51 increasing with longevity. Results underscore the essential importance of decade and longer studies for revealing the  
52 long-term dynamics and emergent outcomes of agricultural practices for different sustainability attributes and are  
53 consistent with recommendations to support the long-term adoption of no-till management.

54 **HIGHLIGHTS**

- 55       1. We test long-term effects of no-till on yield, soil moisture, and N<sub>2</sub>O fluxes
- 56       2. We examine 29 years of data with a moving window and relative profitability method
- 57       3. It takes at least a decade to detect consistent benefits of no-till
- 58       4. Shorter studies can produce significant but misleading findings
- 59       5. Long studies are essential to reveal the dynamics of agricultural management

60  
61

62 **KEYWORDS**

63 yield, soil moisture, N<sub>2</sub>O fluxes, LTER, power analysis, moving window, profitability of no-till adoption  
64

65  
66  
67  
68

## 69 1 INTRODUCTION

70 Agricultural decisions must promote sustainable benefits in the long-term. Considerable investment is made  
71 to agricultural research and development to inform these important land management decisions (USDA, 2007). The  
72 U.S. alone invests between \$4.6 and \$8.8 billion each year in public and private agricultural research (USDA, 2007)  
73 to promote innovative advances for many aspects of cropping system management (NRC, 2003; Robertson et al.  
74 2008; Spiegel et al., 2018), including crop fertility, pest protection, seed genetics, water management, and soil  
75 health, among others. However, the outcomes of many management changes can be slow to develop and detect,  
76 especially those that depend on slow-to-change attributes of a system such as soil structure and organic matter. This  
77 adds to uncertainty regarding the long-term sustainability of management decisions (Robertson et al., 2008), raising  
78 the potential for misinterpretation of short-term studies.

79 Tillage is a well-researched management strategy that is a case in point. Tillage mechanically incorporates  
80 crop residues and/or amendments into soils, controls weeds, promotes soil warming and drying, and thereby  
81 prepares soil for planting, creating optimal conditions for crop seed germination and emergence (Reicosky et al.,  
82 1995). However, the environmental costs of regular tillage are great, including decreased soil carbon, increased  
83 potential for soil erosion, and poor soil structure (Lal et al., 2007b). Following the 1930's dustbowl, U.S.  
84 agronomists and soil scientists became increasingly concerned about the long-term environmental sustainability of  
85 tillage-based agriculture (Derpsch et al., 2010). With the advent of modern herbicides in the 1960's, along with  
86 glyphosate resistant crops in the 1990's, no-till, whereby crop residues are left on the surface following harvest, has  
87 become gradually more popular. No-till can often increase soil carbon, soil quality and function, and reduce CO<sub>2</sub>  
88 emissions when compared to conventional tilling practices (Karlen et al., 1994; Kladivko, 2001; Bolliger et al.,  
89 2006).

90 In the last few decades, though it varies by crop, the adoption of no-till continues to rise (Claassen et al.,  
91 2018). The most recent USDA survey estimates that no-till and strip till accounts for 45 % of total U.S. acreage in  
92 wheat (2017), 40 % in soybeans (2012), 18 % in cotton (2015), and 27 % in corn (2016) (Claassen et al., 2018). A  
93 large global meta-analysis of no-till productivity across a range of climates, soils, and crop types found that no-till  
94 management consistently out-performed conventional tillage for rainfed crops in dry climates (Pittilkow et al.,  
95 2015). However, in more mesic climates, or under irrigated conditions, differences were more variable. Some of the  
96 variation uncovered by this meta-analysis is likely due to the short duration of many of the studies – only 60 of the  
97 520 studies lasted 10 years or longer.

98           Short-term research experiments are important for identifying ecosystem related changes to land  
99 management in a timely and efficient manner. In fact, for a variety of reasons, including research funding cycles,  
100 human or business constraints, and/or a need for actionable solutions, agricultural research is often performed on  
101 truncated time scales. Yet, research conducted at these shorter time scales has the potential to be misleading. Short-  
102 term research can be insufficient especially for evaluating ecosystem properties and phenomena that change slowly,  
103 such as soil structure and soil carbon, or require proper evaluation over an appropriately variable climate and pest  
104 history (Paustian et al., 1997; Rasmussen et al., 1998; Robertson et al., 2008).

105           Beyond the variable findings that surround the relative environmental benefits of no-till, economic  
106 concerns have also slowed the adoption of more sustainable practices (Wade and Claassen, 2017). Surveys suggest  
107 that when asked, growers responded that compared to other factors (e.g. lack of education and/or information,  
108 resistance to change, social considerations, infrastructure, or landlessness), economic concerns are the largest barrier  
109 to adopting sustainable agricultural practices, such as no-till management (Rodriguez et al., 2009). Converting a  
110 field to no-till involves both the upfront expenses of investment in novel machinery (Krause and Black, 1995), as  
111 well as the increased herbicide cost of controlling weeds, which can exceed the short-term savings associated with  
112 reduced tillage. Thus, growers may choose to avoid no-till as a result of both the uncertainty surrounding benefits as  
113 well as short-term economic hurdles.

114           That many of the attributes and perhaps functional benefits of no-till management may take decades to  
115 develop consistent impacts on yields, profits, and environmental outcomes begs three questions: 1) How long does  
116 continuous no-till need to be implemented (or studied) until economic and ecological benefits are consistently  
117 detectable? 2) How consistent are changes in economic and environmental attributes over long periods? 3) How  
118 many years of continuous no-till management are needed to recoup the upfront expenses of converting  
119 conventionally tilled fields to continuous no-till management? We use a 29-year experimental dataset and power  
120 analysis for a long-term research site in the upper Midwest, U.S. to 1) determine the number of years required for  
121 differences in crop yield, soil moisture, and N<sub>2</sub>O fluxes to be detectable, 2) investigate the consistency of trends over  
122 time, and 3) determine the number of years before continuous no-till consistently recovers initial management costs.  
123 To address questions 2 and 3, we use a moving window approach. To further address question 3, we also use a  
124 partial budgeting analysis of relative profitability.

## 125 **2 METHODS**

### 126 **2.1 Study site and treatments**

127 We explicitly tested the economic and ecological effects of no-till in the Main Cropping System Experiment  
128 (MCSE) of the Kellogg Biological Station Long-Term Ecological Research site (LTER) located in southwest  
129 Michigan (42°24' N, 85°24' W) in the northeastern portion of the U.S. Corn Belt. The mean annual air temperature  
130 at KBS is 10.1 °C, ranging from a monthly mean of -9.4 °C in January to 28.9 °C in July. Rainfall averages  
131 1027 mm yr<sup>-1</sup>, evenly distributed seasonally; potential evapotranspiration exceeds precipitation for about four  
132 months of the year. Loam soils are well-drained Typic Hapludalfs developed on glacial outwash with soil carbon  
133 contents around 1% C (Syswerda et al., 2011). More details are available in Robertson and Hamilton (2015).

134 The MCSE was established in 1989 and includes corn (*Zea mays* L.), soybean (*Glycine max* L.), and wheat  
135 (*Triticum aestivum* L.) rotations under varied management regimes, each replicated as 1 ha plots in six blocks.  
136 Management treatments include conventional tillage, with fertilizer and pesticides applied at rates based on soil-test  
137 recommendations, integrated pest management, and moldboard or chisel plow tillage; and no-till, similar to  
138 conventional tillage but continuous no-till (Figure 1). Nine additional non-tillage related treatments occur at the site  
139 and are not used in this study. Conventional tillage consisted of moldboard plowing in the spring from 1989 to 1998,  
140 and chisel plowing in the spring from 1999 to present. Additional tillage consisted of disking before winter wheat  
141 planting. Tillage plots were planted with a John Deere Planter. No-till management requires specialized seeding  
142 equipment such as seed drills to plant seeds into undisturbed crop residues and soil. No-till was planted with a John  
143 Deere planter drill. Both treatments were harvested using a John Deere combine. Site history prior to 1989 consisted  
144 of mixed agricultural and horticultural cropping for 100+ years, with the most recent years prior to experiment  
145 establishment dominated by conventionally managed continuous corn production. In 2009, soybean varieties were  
146 changed from conventional to transgenic (glyphosate resistant) and in 2011 corn varieties changed from  
147 conventional to transgenic (glyphosate, European corn borer, and root worm resistant), consequently reducing the  
148 expense of post planting agrichemical management. Detailed descriptions of the treatments, management protocols,  
149 and site history are provided in Robertson and Hamilton (2015).

## 150 **2.2 Linear regression and power analysis**

151 To test the time required to detect the effects of tillage change (Question 1), we examined both relative  
152 profitability and environmental responses to conventional and no-till management treatments over a 29-year period  
153 from 1989 to 2017. Wheat was typically harvested in June, and soybean and corn in October and November,  
154 respectively, although some deviations occurred due to weather and crop maturity. Biomass was dried at 60° C for at  
155 least 48 h, weighed, and reported as Mg at standard moisture.

156 We also assessed the effect of tillage on soil moisture and N<sub>2</sub>O gas fluxes, our environmental response  
157 variables. Soil moisture affects microbial activity, carbon and nutrient availability and movement, and plant growth,  
158 in particular (Lal, 2004). Soil moisture was determined gravimetrically by drying 40 grams of fresh soil at 60° C for  
159 48 hours. After drying, samples were reweighed, and gravimetric soil moisture was calculated as the difference  
160 between fresh and dry weight, expressed as dry weight (g H<sub>2</sub>O/g dry soil) (<http://www.lter.kbs.msu.edu>). Nitrous  
161 oxide (N<sub>2</sub>O) is an ozone depleting greenhouse gas (Ravishankara et al., 2009) and agricultural soil management is  
162 the largest anthropogenic source of N<sub>2</sub>O emissions globally (Paustian et al., 2016). N<sub>2</sub>O gas measurements were  
163 made using static chambers (Livingston and Hutchinson, 1995) at weekly to monthly intervals when soils were not  
164 frozen (Gelfand et al., 2016). Single chambers were located in four of the six blocks of each tillage treatment.  
165 Chamber lids were placed on semi-permanent aluminum bases removed only for cropping activities and  
166 accumulated headspace was sampled four times over 120 minutes. All chambers were sampled on the same dates,  
167 although no data are available for 1995. Samples were stored in 3-mL crimp-top vials and analyzed in the laboratory  
168 for N<sub>2</sub>O with the flux for each chamber calculated as the linear portion of the gas accumulation curve for that  
169 chamber. Nitrous oxide was analyzed by gas chromatography using a <sup>63</sup>Ni electron capture detector. More details  
170 appear in Gelfand et al. (2016).

171 To test for tillage related changes in crop yield, soil moisture, and N<sub>2</sub>O fluxes over our 29-year period we  
172 fit linear mixed effects models to the data using crop (corn, soybean, wheat) and block (1-6 or 1-4) as fixed  
173 variables, year as a random variable, and difference in crop yield, soil moisture, and N<sub>2</sub>O fluxes as response  
174 variables with the ‘lmer4’ package in R (Bates et al., 2015). We then executed a power analysis for our linear mixed  
175 effects models through simulation with a traditional alpha value of 0.05, 1000 simulations, and power of 0.8, using  
176 the ‘simr’ package in R (Green et al., 2019). We also executed a second power analysis at a more liberal alpha value  
177 for comparison (alpha = 0.2, a lower, less confident level of significance).

### 178 **2.3 Moving window**

179 To investigate our second question, concerning the variability of trends in our long-term dataset, we used  
180 the same response variables described above and a moving window approach. Conceptually, this provides a  
181 trajectory of the relationship of each response variable with time, and describes how the fit of linear mixed effects  
182 models results vary with different sample periods, start years, and durations. We used a moving window algorithm  
183 developed in R (Bahlai, 2019) to measure the overall trajectory and consistency of our response variables throughout  
184 our 29-year dataset. First, we fit linear mixed effects models to defined subsets of data and produced summary

185 statistics of interest (e.g. slope of the relationship between the response variable and time, standard error of this  
186 relationship, and p-value). The moving window then iterated through the entire dataset at set intervals. We used  
187 moving windows of three-year periods or longer, fed each interval through the algorithm described above, and  
188 compiled resulting summary statistics. The direction and magnitude of statistically significant slopes are plotted  
189 against corresponding window length (number of years) to investigate the relationship between trend consistency,  
190 direction, and magnitude with study duration.

#### 191 **2.4 Partial Budgeting Relative Profitability Analysis**

192 To answer our third question, comparing the expense of implementation and management of the two tillage  
193 systems, we used a partial budgeting relative profitability analysis combined with the moving window approach,  
194 described above. We determined the relative profitability benefits of no-till management as the difference in annual  
195 gross margins between no-till and conventional till treatments (Cimmyt and Cimmyt, 1988). Gross margins were  
196 calculated as annual crop grain yield multiplied by current year crop price (\$/kg) minus costs that varied between the  
197 two treatments. We subdivided the gross margins by tracking differences in crop revenues and expenses between the  
198 treatments. For revenues, we determined differences in yield as described in section 2.1 and crop prices as the U.S.  
199 monthly average price received for corn, soybean, and wheat at time of harvest (December, November, and June,  
200 respectively) (FarmDoc, 2019) (ESM Table 1).

201 We determined the relative expenses of no-till management as the combined difference in expense of input  
202 and custom work rates between the two treatments. We determined input expenses only for those chemical inputs  
203 that differed in application between the two treatments as described in the KBS ‘Expanded Agronomic Log’  
204 (<http://www.lter.kbs.msu.edu>). All differences were first converted to fluid oz/ha or kg/ha and then, using historic  
205 prices (USDA, 2019), into differences in expense and revenue, expressed in \$/ha each year. We determined  
206 differences in custom work rates between treatments using information from the Michigan State University  
207 Department of Agricultural Food and Resource Economics (Michigan State University, 2019) between 1994 and  
208 2018. Years prior to 1994 and years with missing values were extrapolated and interpolated, respectively, from an  
209 estimated linear relationship. Conventional tillage expenses included the custom rates for tillage (moldboard or  
210 chisel plow), soil finishing, and planting. No-till expenses included custom rates for planting, spraying, and mowing.  
211 Custom work estimates include the expense of labor, fuel, and equipment rental. Custom rates in Michigan were  
212 compared to those calculated in Iowa between 1995-2014 (Edwards and Johanns, 2014), and were found to follow  
213 similar trajectories over time. Finally, differences in revenue (\$/ha) and expense (\$/ha) were converted from



214 different time periods to present values (base year 2017) using the present value formula:  $PV = FV(1+i)^{-n}$ , where  
215 “*PV*” is present value, “*FV*” is future value, “*i*” is interest rate (we used 5%), and “*n*” is the number of years.  
216 Derivation of value estimates of expenses and revenue by year are given in supplemental materials (ESM Table 1).  
217 We determined accumulated expenses, revenue, and difference between treatments (no-till – conventional) to  
218 determine when no-till managed blocks recuperate initial implementation and ongoing maintenance expenses.  
219 Curves were estimated using third order polynomials:  $USD/ha = a * Year + b * Year^2 + c * Year^3$ , where ‘*a*’, ‘*b*’, and  
220 ‘*c*’ are coefficients (estimates provided in ESM Table 2).

221 To understand the consistency of relative profitability over time intervals, we applied the moving window  
222 approach as described above. Conceptually, we are interested in the trajectory of the relationship between  
223 accumulated relative profitability between no-till and conventional agriculture with time, and how linear mixed  
224 effects model outputs vary with the starting point of sample period and sample period duration. The direction and  
225 magnitude of statistically significant slopes were plotted against corresponding window length (number of years) to  
226 investigate the relationship between relative profitability trend consistency, direction, and magnitude with study  
227 duration.

## 228 **3 RESULTS**

### 229 **3.1 Summary of study site and treatments**

230 Between 1989 and 2017, differences in corn yield between treatments (no-till – conventional) ranged from  
231 -3.57 Mg/ha in 1999 to 2.91 Mg/ha in 2008 and averaged 0.68 Mg/ha (SE: 0.017). Differences in soybean yield (no-  
232 till – conventional) ranged from -2.68 Mg/ha in 1994 to 1.07 Mg/ha in 2006 and averaged 0.306 Mg/ha (SE: 0.007).  
233 Differences in wheat yield (no-till – conventional) ranged from -4.14 Mg/ha in 2001 to 1.62 Mg/ha in 2010 and  
234 averaged 0.042 Mg/ha (SE: 0.001). Over the same time period, differences in soil moisture between the two  
235 treatments across crop types (no-till – conventional) ranged from -0.026 g H<sub>2</sub>O/g dry soil in 1990 to 0.05 g H<sub>2</sub>O/g  
236 dry soil in 2013 and averaged 0.02 g H<sub>2</sub>O/g dry soil (SE: 0.002). Differences in N<sub>2</sub>O gas fluxes between the two  
237 treatments (no-till – conventional) ranged from -4.3 g N<sub>2</sub>O-N ha<sup>-1</sup> d<sup>-1</sup> in 2007 to 6.9 g ha<sup>-1</sup> day<sup>-1</sup> in 2000 and  
238 averaged 0.4 g ha<sup>-1</sup> d<sup>-1</sup> (SE: 0.2).

### 239 **3.2 Linear regression and power analysis**

240 Using linear mixed effects models to address our first question, we found a significant positive relationship  
241 between window duration and difference in crop yield (Estimate: 0.043, T: 4.96, P < 0.001) (Figure 2a). Further, we  
242 found a significant positive relationship between differences in soil moisture and duration between no-till and

243 conventionally managed treatments (Estimate 0.0003, T: 4.005,  $P < 0.001$ ) (Figure 2b). Lastly, we found a non-  
244 significant relationship between differences in N<sub>2</sub>O fluxes and window duration between no-till and conventionally  
245 managed treatments (Estimate: -0.012, T: -0.39, P: 0.70) (Figure 2c).

246 In a conservative power analysis, we found that with a calculated effect size of 0.043, alpha of 0.05, and  
247 power of 0.8, it would take at least 19 years to detect a significant effect of the no-till treatment on crop yield using a  
248 linear mixed effects model. Likewise, with a calculated effect size of 0.0003, it would take 25 years to detect a  
249 significant effect of the no-till treatment on soil moisture. Lastly, even with a calculated effect size of -0.012, we  
250 would not see a significant effect of the no-till treatment on N<sub>2</sub>O flux (Table 1a). Using a more liberal alpha value  
251 that better represents the interests of growers (alpha = 0.2) we see that, given our effect sizes, it would take 16 and  
252 19 years to detect significant effects of no-till management on crop yield and soil moisture, respectively (Table 1b).

### 253 **3.3 Moving window**

254 The moving window algorithm formed 379, 379, and 142 windows of lengths between three and 29 years  
255 for our long-term datasets (difference in yield, soil moisture, and N<sub>2</sub>O fluxes, respectively). Addressing our second  
256 question concerning the consistency of trends, we found that for differences in yield, 250 windows had a positive  
257 slope (66%) and 129 windows had a negative slope (34%). Of the positive trending windows, 170 were significant  
258 at the alpha < 0.05 level; of the negative trending windows, 12 were significant. (Figure 3a, Table 2). For soil  
259 moisture, we found that 299 windows had a positive slope (79%) and 80 windows had a negative slope (21%). Of  
260 the positive trending windows, 128 were significant; of the negative trending windows, 11 were significant (Figure  
261 3b, Table 2). Lastly, for N<sub>2</sub>O fluxes, of the 142 windows, we found 65 windows were positively trending (46%), 77  
262 were negatively trending (54%), and three of the positive windows and seven of the negative windows were found to  
263 be significant (Figure 3c, Table 2).

### 264 **3.4 Partial Budgeting Relative Profitability Analysis**

265 Because the relative cost of no-till flattened out over time while crop yields under no-till increasingly gained  
266 over conventional tillage, the accumulated expenses (\$/ha) of no-till compared to conventional management did not  
267 grow as fast as the accumulated revenue. Hence, gross margin differences reveal that while no-till was a money  
268 loser in early years, by the end of 2002 (13 years after implementation), no-till recuperated initial losses at our site.  
269 By 2017, no-till had accumulated nearly \$2,000/ha in differences in relative profitability as measured by partial  
270 budgets (Figure 4, ESM Table 1, ESM Table 2). Using the moving window algorithm on the partial budgeting  
271 analysis of relative profitability, we see that of the 379 windows formed, 338 were significant at the  $p < 0.05$  level.

272 While most trends were positive, of windows between 3 and 10 years long, 37% (57/156) were negatively trending,  
273 19% (26/137) windows between 11 and 20 years long were negatively trending, and of the windows between 21-29  
274 years long none (0/46) were negatively trending (Figure 5, Table 3).

#### 275 **4 DISCUSSION**

276 Using a long-term experimental dataset spanning nearly 30 years, combined with power analysis and a  
277 moving window approach, we found that both yield and soil moisture require periods 15 years or longer to generate  
278 consistent results in this rainfed corn-soybean-wheat system in the upper Midwest U.S. In fact, given our effect  
279 sizes, it would take 16 and 19 years to detect significant effects of no-till management on crop yield and soil  
280 moisture, respectively, even with a liberal alpha value ( $\alpha = 0.2$ ). Analyses performed on periods shorter than 15  
281 years suggest misleading trends, even though these findings were sometimes statistically significant.

282 Through relative profitability analysis, we found that 13 years were needed to fully recover the initial  
283 expenses of no-till management in our system, and that the longer the implementation of no-till, the greater  
284 likelihood of relative profitability, regardless of stochastic effects. Here, we show that more than a decade is needed  
285 to detect the consistent benefits of continuous no-till on these economic and environmentally important attributes,  
286 suggesting that a shorter-term experiment could have led to contradictory, and potentially misleading results.

287 Nine out of 45 significant results for periods shorter than 10 years support a negative relationship between  
288 no-till and the difference in yield over time (20%), in direct contradiction to the positive pattern we observed. Only  
289 analyses performed on periods 10 years or longer resemble more closely the broader positive pattern. Further, 31%  
290 (11/35) of the analyses on periods shorter than 10 years indicate a statistically significant negative relationship for  
291 soil moisture over time, in direct contradiction to the relationship suggested by longer periods. Among the periods  
292 tested for N<sub>2</sub>O fluxes, 10 of 142 were found to contain a statistically significant trend (seven negative and three  
293 positive). This low detection of significant trends is consistent with recent N<sub>2</sub>O flux meta-analyses (e.g., Van Kessel  
294 et al., 2013), where only for studies greater than 10 years duration, particularly in drier climates, were trends of  
295 lower fluxes in no-till than conventional management significant. Results from the present site suggest that such a  
296 trend may take substantially longer (perhaps scores of decades) to detect, likely in part due to relative increases in  
297 N<sub>2</sub>O fluxes for the rotation's corn and soybean years offsetting decreases in wheat years (Gelfand et al., 2016).  
298 Trends may not emerge until the rotation or some other important aspect of agricultural management changes, such  
299 as fertilizer rate (Shcherbak et al., 2014). Nevertheless, no-till does not (yet) have consistent detectable effects on  
300 N<sub>2</sub>O fluxes at this site, as noted for earlier shorter-term analyses (Robertson et al., 2000; Grandy et al., 2006;

301 Gelfand et al., 2016). The importance of N<sub>2</sub>O-N for mitigating the global warming impact of intensive cropping  
302 systems underscores the importance of better understanding such time-dependent trends (Six et al., 2004).

303 Lastly, we show that longer periods of implementation increase the likelihood that continuous no-till agriculture  
304 becomes more profitable than tillage. Immediately following implementation of no-till management (periods  
305 between 3 and 10 years) more than one third of periods resulted in the loss of net revenue (37%). However, as  
306 periods became longer, the likelihood of greater relative profitability increased. In fact, for periods between 11 and  
307 20 years long, fewer than 20% of periods lost revenue, and in periods between 21 and 29 years, all periods were  
308 profitable. Overall, 86% of periods greater than 10 years were profitable. We also note that, beyond the purely fiscal  
309 benefits accrued, were value given for environmental impacts of continuous no-till (i.e. carbon sequestration,  
310 reduced nitrate leaching, etc.) the benefits would further increase.

311 Our results show that even in the absence of an overarching trend, spurious relationships in temporal processes  
312 or short-term trends associated with stochastic processes are common in tillage systems. Thus, the conflicting trends  
313 and predictions noted in previous studies concerning the impact of tillage on crop yield, soil moisture, and N<sub>2</sub>O  
314 fluxes may be explained, at least in part, by their durations: strong, statistically significant relationships between  
315 parameters and duration may have been the result of high variation in the system over shorter time periods. This  
316 phenomenon of confident though misleading results highlights the importance of long-term studies for detecting  
317 trends and informing management recommendations with confidence.

318 To maximize the impact of research at any time scale, it is essential to understand how patterns emerge as  
319 studies become longer, enabling us to more effectively extrapolate results to long-term patterns. As our results show,  
320 variation can be highly idiosyncratic and dependent on study duration. Predicting the future effects of continuous  
321 no-till depends on understanding both the short-and long-term dynamics of crops following significant changes in  
322 management. This is likely to be especially important for detecting the consequences of slow to change properties  
323 like soil organic matter accretion following no-till initiation.

324 Our results highlight the importance of not only study duration, but also of the selection of study starting and  
325 ending points. If a study period captures an outlying data point in a system's natural variability near the beginning or  
326 end of the study, those years are likely to be disproportionately influential on statistical outcomes and thus on  
327 conclusions, and presumed management implications (Swinton and King, 1991; White, 2019). Periods that reveal  
328 contrary results may be the response of high variation, possibly caused by extreme weather events, changes in crops,  
329 or other system level idiosyncrasies.

330 In the case of no-till implementation, transient dynamics leading to short-term risks associated with no-till  
331 management are likely to be captured by short-term studies that focus on the establishment of no-till at new locales.  
332 These risks include increased pest and disease danger, altered nitrogen cycling, and increased nutrient requirements  
333 due to nutrient immobilization under cooler soil temperatures (Baker et al., 1996). Also, due to the potential slower  
334 soil warm-up in the spring, no-till management may result in stunted growth in initial years. Lastly, increased  
335 pressure by herbicide resistant weeds may cause future problems (Van Deynze et al., 2018).

336 However, as revealed by our results, benefits at our site accrue over time. As Choudhary and Baker (1994)  
337 predicted, despite potential negative results in the first few years of no-till, benefits of the reduced fertilizer  
338 requirements and pest protection, as well as an increased stable crop yield, are only realized with long-term  
339 management. Further, because continuous no-till can be economically attractive for other reasons in the long term  
340 (e.g. reduced machinery fuel, energy, and maintenance costs (Lal et al., 2007a; Rathke et al., 2007)), our results are  
341 consistent with recommendations to support the long-term adoption of no-till management despite initial losses.

## 342 **5 CONCLUSIONS**

343 We used 29 years of no-till crop management data to reveal the temporal processes and long-term impacts of a  
344 change in agricultural management at a site in the U.S. corn belt. We illustrate that management recommendations  
345 based on short term studies can be contradictory because spurious, misleading trends can appear in time series at  
346 rates between 20 and 50% of the time, even independent of stochastic elements associated with external  
347 disturbances. Furthermore, the initiation of a new experiment almost certainly represents a strong disturbance to an  
348 ecosystem, thus the early years in a study involving temporal processes may produce data that is not representative  
349 of the system's equilibrium behavior. Our results are consistent with recommendations to support the long-term  
350 adoption of no-till agricultural management despite initial losses.

## 351 **6 ACKNOWLEDGMENTS**

352 This work was performed on the traditional Anishinaabe land where Hickory Corners, Michigan is currently located.  
353 Support for this work was provided by the National Science Foundation Long-term Ecological Research Program  
354 (DEB 1832042) at the Kellogg Biological Station, USDA National Institute on Food and Agriculture, and by  
355 Michigan State University AgBioResearch. Thanks to KBS colleagues for providing data and maintaining  
356 experimental infrastructure, especially Sven Bohm for database curation. The scaling algorithm was developed by  
357 CB in response to conversations with Elise Zipkin, Ilya Gelfand, Kaitlin Stack Whitney, Easton White, and Julia

358 Perrone, and is funded by the National Science Foundation Directorate for Computer and Information Science and  
359 Engineering (OAC 1838807).  
360

361 **7 REFERENCES**

362 Bahlai, C., 2019. GitHub, bad\_breakup. [https://github.com/cbahlai/bad\\_breakup](https://github.com/cbahlai/bad_breakup) (accessed 20 March 2019)

363

364 Baker, C.J., Saxton, K.E., Ritchie, W.R., 1996. No-tillage seeding: science and practice. Cambridge University  
365 Press, Cambridge

366

367 Bates, D., Maechler, M., Bolker, B., Walker, S., 2015. Fitting Linear Mixed-Effects Models Using lme4. *J. Stat.*  
368 *Software.* 67:1-48. doi:10.18637/jss.v067.i01

369

370 Bolliger, A., Magid, J., Amado, J.C., Neto, F.S., dos Santos Ribeiro, M.D., Calegari, A., Ralisch, R., de Neergaard,  
371 A., 2006. Taking stock of the Brazilian “Zero-Till Revolution”: A Review of Landmark Research and  
372 Farmers' Practice. *Adv. Agron.* 91:47-110. doi: 10.1016/S0065-2113(06)91002-5

373

374 Choudhary, M.A., Baker, C.J., 1994. Overcoming constraints to conservation tillage in New Zealand. *Conservation*  
375 *Tillage in Temperate Agro-ecosystems.* Lewis Publisher, Boca Raton

376

377 Claassen, R., M., Bowman, J., McFadden, D., Wallander S., 2018. Tillage Intensity and Conservation  
378 Cropping in the United States. Economic Research Service, U.S. Department of Agriculture.  
379 <https://www.ers.usda.gov/webdocs/publications/90201/eib-197.pdf?v=1783.8>

380

381 Cimmyt, M., Cimmyt, M., 1988. From agronomic data to farmer recommendations: an economics training manual.  
382 Completely Revised ed. Mexico City: Centro Internacional de Mejoramiento de Maíz y Trigo (CIMMYT).

383

384 Derpsch, R., Friedrich, T., Kassam, A., Li, H., 2010. Current status of adoption of no-till farming in the world and  
385 some of its main benefits. *Int. J. Agr. Biol. Eng.* 3:1-25. doi: 10.3965/j.issn.1934-6344.2010.01.0-0

386

387 Edwards, W., Johanns, A., 2014. Iowa Farm Custom Rate Survey. Iowa State University Extension and Outreach,  
388 Ag Decision Maker file C2-21/FM-1698. [www.extension.iastate.edu/agdm/](http://www.extension.iastate.edu/agdm/) (Accessed 20 March 2019)

389

- 390 FarmDoc, 2019. US Average Farm Price Received Database.  
391 [http://www.farmdoc.illinois.edu/manage/uspricehistory/us\\_price\\_history.html](http://www.farmdoc.illinois.edu/manage/uspricehistory/us_price_history.html) (accessed 20 March 2019)  
392
- 393 Gelfand, I., Shcherbak, I., Millar, N., Kravchenko, A.N., Robertson, G.P., 2016. Long-term nitrous oxide fluxes in  
394 annual and perennial agricultural and unmanaged ecosystems in the upper Midwest USA. *Global Change*  
395 *Biol.* 22: 3594-3607. doi 10.1111/gcb.13426  
396
- 397 Grandy, A.S., Loecke, T.D., Parr, S., Robertson, G.P., 2006. Long-term trends in nitrous oxide emissions, soil  
398 nitrogen, and crop yields of till and no-till cropping systems. *J. Environ. Qual.* 35:1487-1495. doi:  
399 10.2134/jeq2005.0166  
400
- 401 Green, P., MacLeod, C.J., 2016. SIMR: an R package for power analysis of generalized linear mixed models by  
402 simulation. *Methods Ecol. Evol.* 7: 493-498. doi: 10.1111/2041-210X.12504  
403
- 404 Karlen, D.L., Wollenhaupt, N.C., Erbach, D.C., Berry, E.C., Swan, J.B., Eash, N.S., Jordahl, J.L., 1994. Long-term  
405 tillage effects on soil quality. *Soil Till. Res.* 32: 313-27. doi: 10.1016/0167-1987(94)00427-G  
406
- 407 Kladivko, E.J., 2001. Tillage systems and soil ecology. *Soil Till. Res.* 61: 61-76. doi: 10.1016/S0167-  
408 1987(01)00179-9  
409
- 410 Krause, M.A., Black J.R., 1995. Optimal Adoption Strategies for No-Till Technology in Michigan. *Rev. Argic.*  
411 *Econ.* 17: 299-310. doi: 10.2307/1349575  
412
- 413 Lal, R., 2004. Soil carbon sequestration to mitigate climate change. *Geoderma.* 123: 1-22. doi  
414 10.1016/j.geoderma.2004.01.032  
415
- 416 Lal, R., Follett, R.F., Stewart, B.A., Kimble, J.M., 2007a. Soil carbon sequestration to mitigate climate change and  
417 advance food security. *Soil Sci.* 172: 943-56. doi: 10.1097/ss.0b013e31815cc498  
418



- 419 Lal, R., Reicosky, D. L., Hanson, J.D., 2007b. Evolution of the plow over 10,000 years and the rationale for no-till  
420 farming. *Soil & Tillage Research*. 93:1-12. doi: 10.1016/j.still.2006.11.004  
421
- 422 Livingston, G.P. Hutchinson, G.L., 1995. Enclosure-based measurement of trace gas exchange: applications and  
423 sources of error. *Biogenic trace gases: measuring emissions from soil and water*. 51: 14-51  
424
- 425 Michigan State University, Department of Agricultural Food and Resource, Economics.  
426 [https://www.canr.msu.edu/afre/centers\\_services/economic\\_analysis\\_of\\_sustainable\\_ag\\_food\\_systems/useful\\_data\\_sources](https://www.canr.msu.edu/afre/centers_services/economic_analysis_of_sustainable_ag_food_systems/useful_data_sources) (accessed 20 March 2019)  
427  
428
- 429 Michigan State University, Kellogg Biological Station, 2019. KBS LTER Data Catalog.  
430 <https://lter.kbs.msu.edu/datatables> (accessed 20 March 2019)  
431
- 432 Noordzij, M., Tripepi, G., Dekker, F.W., Zoccali, C., Tanck, M. W., Jager, K.J., 2010. Sample size calculations:  
433 basic principles and common pitfalls. *Nephrol. Dial. Transplant*. 25: 1388-1393. doi: 10.1093/ndt/gfp732  
434
- 435 NRC (National Research Council). 2003. *Frontiers in agricultural research. Food, health, environment, and*  
436 *communities*. National Academy Press, Washington DC  
437
- 438 Paustian, K.A.O.J.H., Andr n, O., Janzen, H.H., Lal, R., Smith, P., Tian, G., Tiessen, H., Van Noordwijk, M.,  
439 Woerner, P.L., 1997. Agricultural soils as a sink to mitigate CO2 emissions. *Soil Use Manage*. 13: 230-  
440 244. doi: 10.1111/j.1475-2743.1997.tb00594.x  
441
- 442 Paustian, K., Lehmann, J., Ogle, S., Reay, D., Robertson, G.P., Smith, P., 2016. Climate-smart soils. *Nature*. 532:  
443 49. doi: 10.1038/nature17174  
444
- 445 Pittelkow, C.M., Linqvist, B.A., Lundy, M.E., Liang, X., van Groenigen, K.J., Lee, J., van Gestel, N., Six, J.,  
446 Venterea, R.T., van Kessel, C., 2015. When does no-till yield more? A global meta-analysis. *Field Crop*  
447 *Res*. 183:156-68. doi: 10.1016/j.fcr.2015.07.020

- 448
- 449 Rasmussen, P.E., Goulding, K.W.T., Brown, J.R., Grace, P.R., Janzen, H.H., Korschens M., 1998. Long-term  
450 agroecosystem experiments: assessing agricultural sustainability and global change. *Science* 282:893-896.  
451 doi: 10.1126/science.282.5390.893
- 452
- 453 Rathke, G.W., Wienhold, B.J., Wilhelm, W.W., Diepenbrock, W., 2007. Tillage and rotation effect on corn–soybean  
454 energy balances in eastern Nebraska. *Soil Till. Res.* 97: 60-70. doi: 10.1016/j.still.2007.08.008
- 455
- 456 Ravishankara, A.R., Daniel, J.S., Portmann, R.W., 2009. Nitrous oxide (N<sub>2</sub>O): the dominant ozone-depleting  
457 substance emitted in the 21st century. *Science*. 326: 123-125. doi: 10.1126/science.1176985
- 458
- 459 Reicosky, D.C., Kemper, W.D., Langdale, G., Douglas, C.L., Rasmussen, P.E., 1995. Soil organic matter changes  
460 resulting from tillage and biomass production. *J. Soil Water Conserv.* 50: 253-61
- 461
- 462 Robertson, G.P., Allen, V.G., Boody, G., Boose, E.R., Creamer, N.G., Drinkwater, L.E., Gosz, J.R., Lynch, L.,  
463 Havlin, J.L., Jackson, L.E. Pickett, S.T., 2008. Long-term agricultural research: a research, education, and  
464 extension imperative. *BioScience*. 58: 640-645. doi:10.1641/B580711
- 465
- 466 Robertson, G.P., Hamilton, S.K., 2015. Long-term ecological research at the Kellogg Biological Station LTER  
467 site. *The ecology of agricultural landscapes: Long-term research on the path to sustainability.* 1-32
- 468
- 469 Robertson, G. P., Paul E. A., Harwood R. R., 2000. Greenhouse gases in intensive agriculture: contributions of  
470 individual gases to the radiative forcing of the atmosphere. *Science*. 289:1922-1925. doi:  
471 10.1126/science.289.5486.1922
- 472
- 473 Rodriguez, J.M., Molnar, J.J., Fazio, R.A., Sydnor, E., Lowe, M.J., 2009. Barriers to adoption of sustainable  
474 agriculture practices: Change agent perspectives. *Renew. Agr. Food Sys.* 24: 60-71. doi: doi:  
475 10.1017/S1742170508002421
- 476

- 477 Shcherbak, I., Millar, N., Robertson, G. P., 2014. Global metaanalysis of the nonlinear response of soil nitrous oxide  
478 (N<sub>2</sub>O) emissions to fertilizer nitrogen. PNAS. 111: 9199-9204. doi: 10.1073/pnas.1322434111  
479
- 480 Six, J., Ogle, S.M., Jay Breidt, F., Conant, R.T., Mosier, A.R. Paustian, K., 2004. The potential to mitigate global  
481 warming with no-tillage management is only realized when practised in the long term. Global Change  
482 Biol. 10: 155-160. doi: 10.1111/j.1529-8817.2003.00730.x  
483
- 484 Spiegel, S., Bestelmeyer, B.T., Archer, D.W., Augustine, D.J., Boughton, E.H., Boughton, R.K., Cavigelli, M.A.,  
485 Clark, P.E., Derner, J.D., Duncan, E.W., Hapeman, C., Harmel, D.H., Heilman, P., Holly, M.A., Huggins,  
486 D.R., King, K., Kleinman, P.J.A., Liebig, M.A., Locke, M.A., Mccarty, G.W., Millar, N., Mirsky, S.B.,  
487 Moorman, T.B., Pierson, F.B., Rigby, J.R., Robertson, G.P., Steiner, J.L., Strickland, T.C., Swain, H.M.,  
488 Wienhold, B.J., Wulfhorst, J.D., Yost, M.A., Walthall, C.L., 2018. Evaluating strategies for sustainable  
489 intensification of US agriculture through the Long-Term Agroecosystem Research network. Environ.  
490 Research Lett. 13:034031. doi: 10.1088/1748-9326/aaa779  
491
- 492 Swinton, S.M., King R.P., 1991. Evaluating Robust Regression Techniques for Detrending Crop Yield Data with  
493 Nonnormal Errors. Am. J. Agr. Econ. 73:446-45. doi: 10.2307/1242729  
494
- 495 Syswerda, S.P., Corbin, A.T., Mokma, D.L., Kravchenko, A.N. Robertson, G.P., 2011. Agricultural management  
496 and soil carbon storage in surface vs. deep layers. SSSA. 75: 92-101. doi:10.2136/sssaj2009.0414  
497
- 498 University of Minnesota Extension, 2019. [https://extension.umn.edu/soil-management-and-health/history-tillage-  
499 and-tillage-research/](https://extension.umn.edu/soil-management-and-health/history-tillage-and-tillage-research/) (accessed 20 March 2019)  
500
- 501 USDA, 2007. Economic Returns to Public Agricultural Research. [http://www  
502 .ers.usda.gov/webdocs/publications/42826/11496\\_eb10\\_1\\_.pdf?v=0](http://www.ers.usda.gov/webdocs/publications/42826/11496_eb10_1_.pdf?v=0) (accessed 20 March 2019)  
503
- 504 USDA, 2019. National Agricultural Statistics Service. <https://quickstats.nass.usda.gov/> (accessed 20 March 2019)  
505

- 506 Van Deynze, B., Swinton S.M., Hennessy D.A., 2018. Are Glyphosate-Resistant Weeds a Threat to Conservation  
507 Agriculture? Evidence from Tillage Practices in Soybean. Paper presented at Agricultural and Applied  
508 Economics Association. Washington, DC, August 5-7, 2018.  
509
- 510 Van Kessel, C., R. Venterea, J. Six, M. A. Adviento-Borbe, B. Linqvist, Van Groenigen., K. J., 2013. Climate,  
511 duration, and N placement determine N<sub>2</sub>O emissions in reduced tillage systems: a meta-analysis. *Global*  
512 *Change Biol.* 19: 33-44. doi: 10.1111/j.1365-2486.2012.02779.x  
513
- 514 Wade, T. Claassen, R., 2017. Modeling no-till adoption by corn and soybean producers: Insights into sustained  
515 adoption. *J. Agricult. Appl. Econom.* 49: 186-210. doi:10.1017/aae.2016.48  
516
- 517 White, E.R., 2019. Minimum time required to detect population trends: the need for long-term monitoring  
518 programs. *BioScience.* 69:40-46. doi: 10.1093/biosci/biy144  
519

520 **8 TABLES**

521 Table 1:

522 Summary of a) power analysis predicting the number of years needed to detect effects of no-till treatment on crop  
523 yield (Mg/ha), soil moisture (g H<sub>2</sub>O/g dry soil), and N<sub>2</sub>O-N (g ha<sup>-1</sup> day<sup>-1</sup>) in linear mixed effects models given a  
524 conservative alpha value of 0.05 and power of 0.8, and b) for a more liberal alpha value of 0.2 and power of 0.8.

525 **a**

|                                                            | Effect | Alpha | Power | <b>Predicted</b> |
|------------------------------------------------------------|--------|-------|-------|------------------|
|                                                            | Size   |       |       | <b>Years</b>     |
| Yield (Mg/ha)                                              | 0.043  | 0.05  | 0.8   | <b>19</b>        |
| Soil Moisture (g H <sub>2</sub> O/g dry soil)              | 0.0003 | 0.05  | 0.8   | <b>25</b>        |
| N <sub>2</sub> O-N (g ha <sup>-1</sup> day <sup>-1</sup> ) | -0.012 | 0.05  | 0.8   | <b>NA</b>        |

**b**

|                                                            |        |      |     |           |
|------------------------------------------------------------|--------|------|-----|-----------|
| Yield (Mg/ha)                                              | 0.043  | 0.20 | 0.8 | <b>16</b> |
| Soil Moisture (g H <sub>2</sub> O/g dry soil)              | 0.0003 | 0.20 | 0.8 | <b>19</b> |
| N <sub>2</sub> O-N (g ha <sup>-1</sup> day <sup>-1</sup> ) | -0.012 | 0.20 | 0.8 | <b>NA</b> |

526

527

528 Table 2: Trend summaries for crop yield (Mg/ha), gravimetric soil moisture (g H<sub>2</sub>O/g dry soil), and N<sub>2</sub>O-N (g ha<sup>-1</sup> d<sup>-1</sup>)  
529 for each block from moving window analysis applied to linear mixed effects models.

530

|                                                            | Total<br>Trends | Total<br>Significant<br>Trends | Positive<br>Trends | Positive<br>Significant<br>Trends | Negative<br>Trends | Negative<br>Significant<br>Trends |
|------------------------------------------------------------|-----------------|--------------------------------|--------------------|-----------------------------------|--------------------|-----------------------------------|
| Yield (Mg/ha)                                              | 379             | 182                            | 250                | 170                               | 129                | 12                                |
| Soil Moisture (g H <sub>2</sub> O/g dry soil)              | 379             | 139                            | 299                | 128                               | 80                 | 11                                |
| N <sub>2</sub> O-N (g ha <sup>-1</sup> day <sup>-1</sup> ) | 142             | 10                             | 65                 | 3                                 | 77                 | 7                                 |

531

532

533 Table 3: Trend summaries for partial budgeting analysis of relative profitability comparing the expense of  
534 implementation and management of the two tillage systems from moving window analysis applied to a linear mixed  
535 effects model using crop (corn, soybean, wheat) and block (1-6) as fixed variables, and year as a random variable.

536

|                  | Total  | Total       | Positive | Positive    | Negative | Negative    |
|------------------|--------|-------------|----------|-------------|----------|-------------|
|                  | Trends | Significant | Trends   | Significant | Trends   | Significant |
|                  |        | Trends      |          | Trends      |          | Trends      |
| Early (3-10 yrs) | 188    | 156         | 115      | 99          | 73       | 57          |
| Mid (11-20 yrs)  | 145    | 136         | 115      | 26          | 30       | 110         |
| Long (21-29 yrs) | 46     | 46          | 46       | 46          | 0        | 0           |
| Full (3-29 yrs)  | 379    | 338         | 276      | 255         | 103      | 83          |

537

538

539

540

541

542

543

544

545

546

547

548

549

550

551

552

553

554

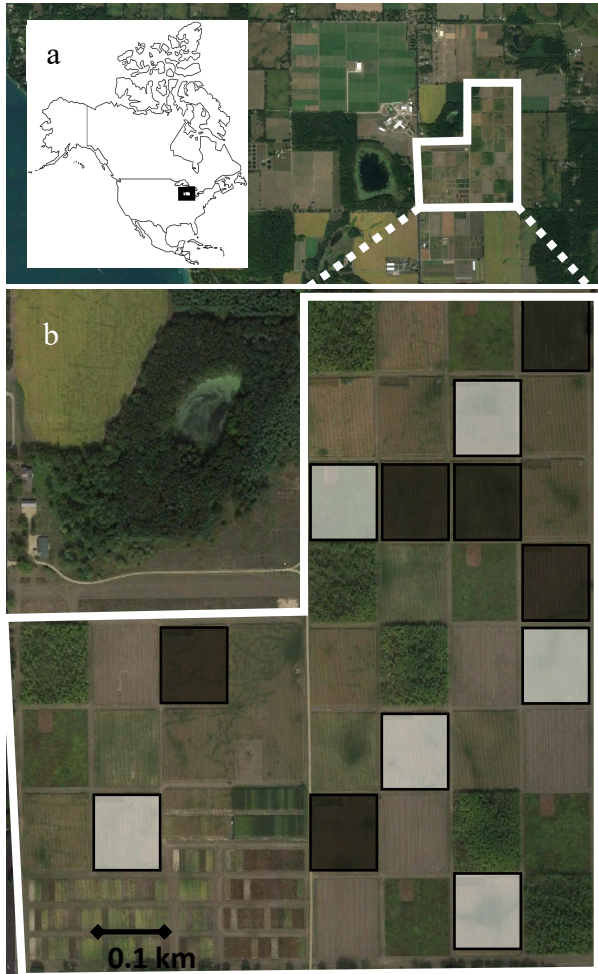

556  
557

Figure 1:

558 Location of study site. a) Inset of North America with outline of study region. Satellite image of the Kellogg  
559 Biological Station LTER in Hickory Corners, Michigan, U.S. b) enlarged image of Main Cropping System  
560 Experiment (MSCE). White squares show conventionally managed 1-ha blocks (N=6) and black squares show no-  
561 till managed 1-ha blocks (N=6). Blocks were established in 1988.

562  
563  
564  
565  
566  
567  
568



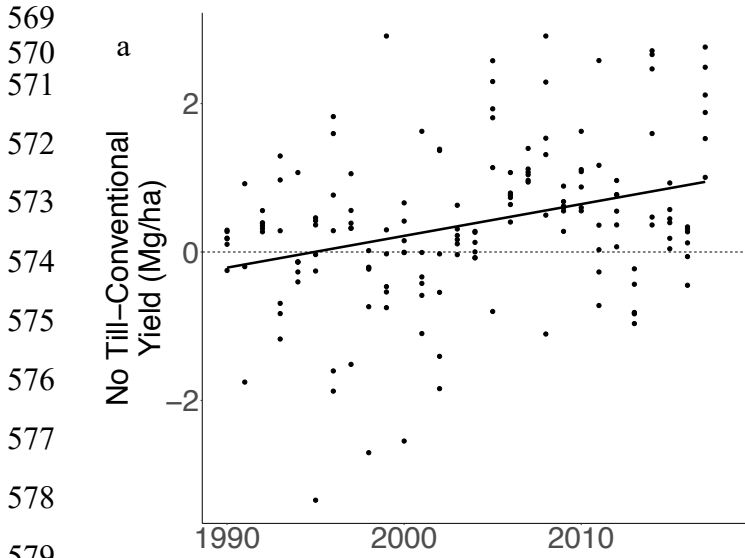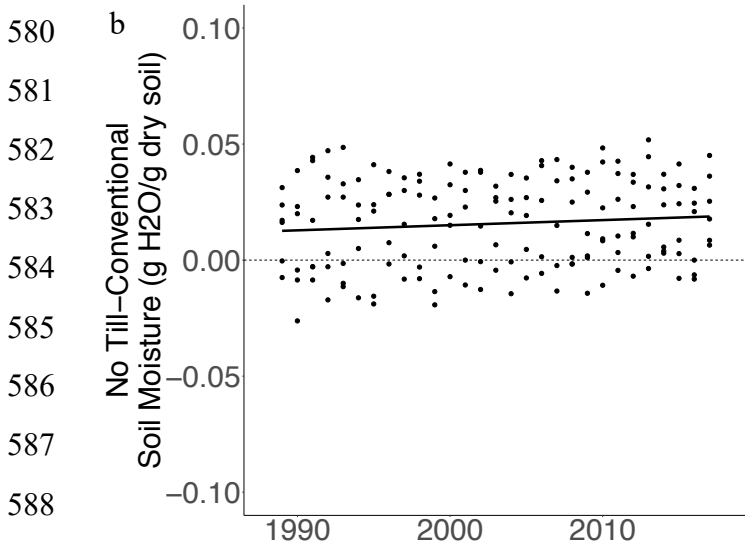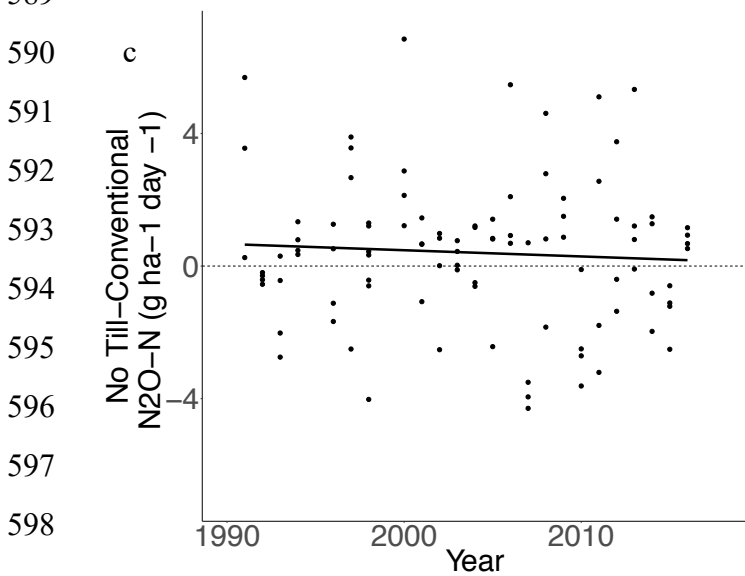

599 Figure 2: Scatterplots showing a) the difference in crop yield (Mg/ha) between no-till and conventional treatments  
600 within each block and year, b) the difference in gravimetric soil moisture (g H<sub>2</sub>O/g dry soil) between no-till and  
601 conventional treatments within each block and year, and c) the difference in N<sub>2</sub>O-N (g ha<sup>-1</sup> day<sup>-1</sup>) between no-till  
602 and conventional treatments within

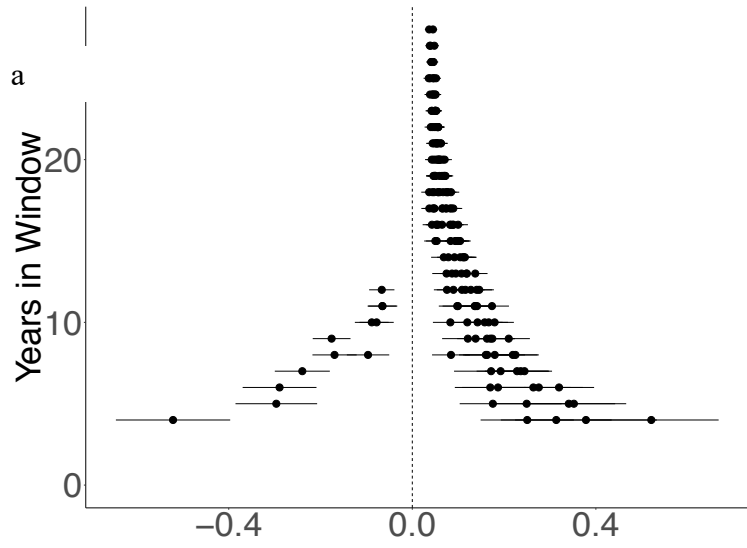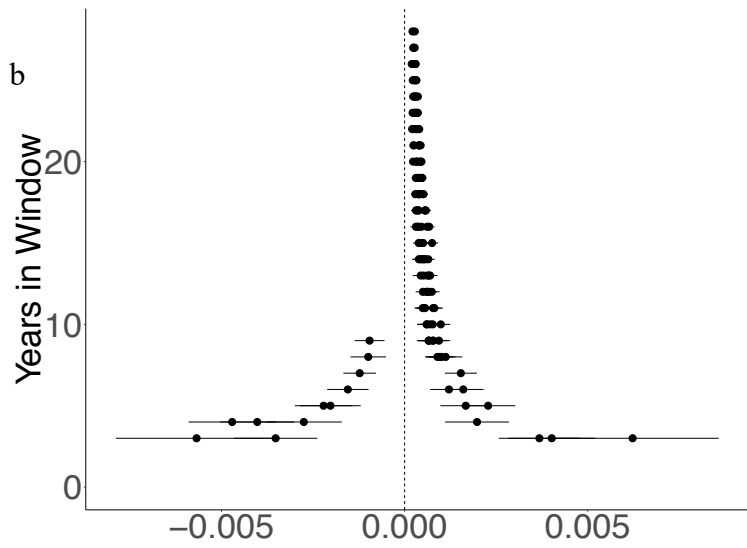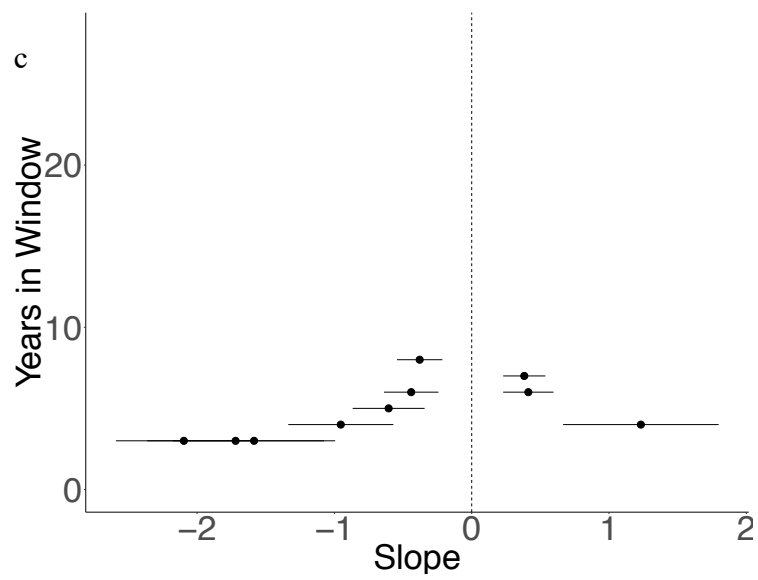

604  
 605 Figure 3. Results from the moving window analysis. Scatterplots showing the relationship between slope and the  
 606 number of years in a given window for a) crop yield (Mg/ha), b) gravimetric soil moisture (g H<sub>2</sub>O/g dry soil), and c)  
 607 N<sub>2</sub>O-N (g ha<sup>-1</sup> d<sup>-1</sup>). Slopes were determined using linear mixed effects models using crop (corn, soybean, wheat) and  
 608 block (1-6) as fixed variables, and year as a random variable for each window of time three years in length or longer,  
 609 between 1988 and 2017. Only models with statistically significant slopes at the alpha < 0.05 level are shown. Dots  
 610 represent slope and solid lines represent standard error. Positive slopes indicate an accruing benefit of no-till  
 611 management over time when compared directly to conventionally managed blocks. The vertical black dotted line  
 612 indicates a slope of zero, where the benefits of no-till management have saturated.

613  
 614

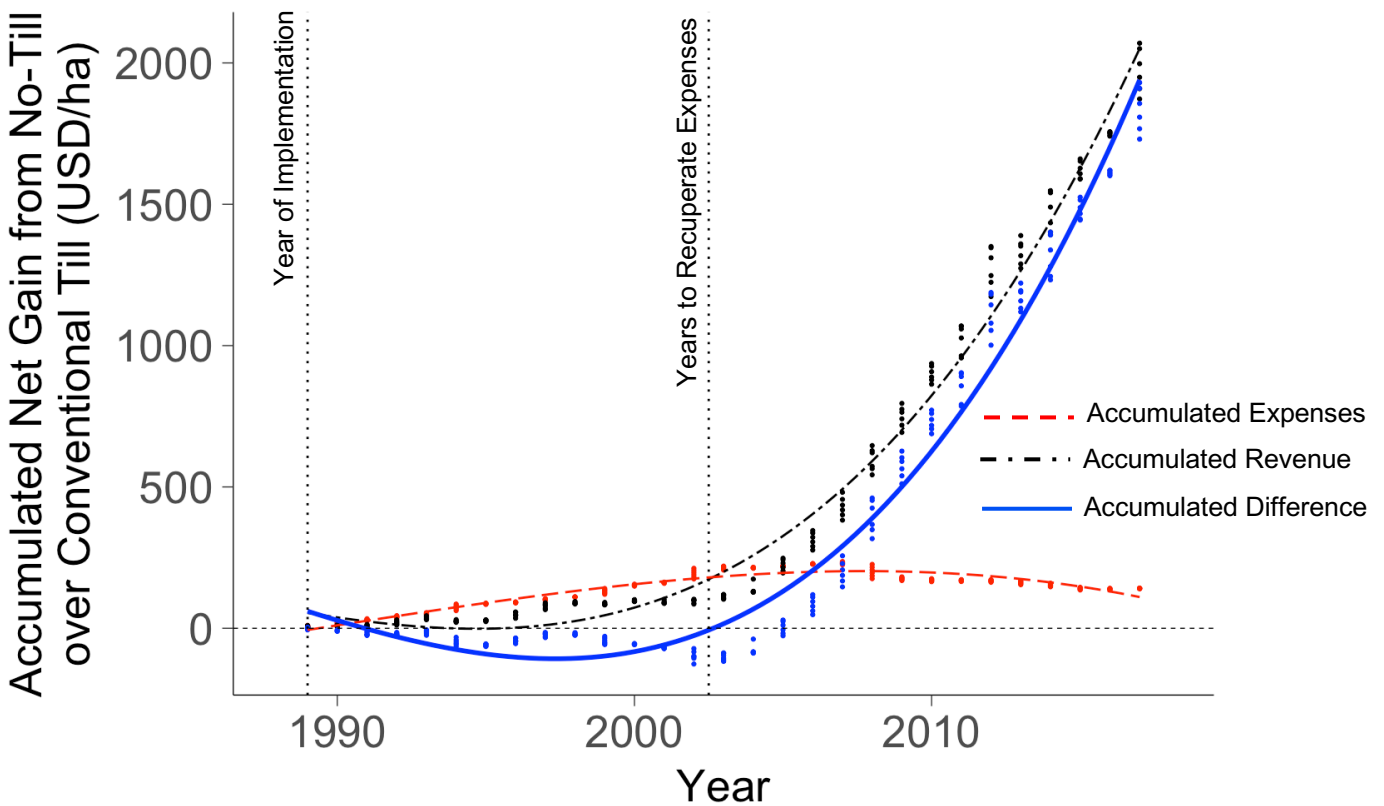

615  
 616 Figure 4. Partial budgeting analysis of relative profitability plot comparing the expense of implementation and  
 617 management of the two tillage systems. Dots represent values for each block each year. Accumulated expenses,  
 618 shown as red dots and the dashed red line, include differences in custom hire (\$/ha) and input expenses (\$/ha)  
 619 between the two treatments (no-till – conventional). Accumulated revenue, shown as black dots and the dashed

620 black line, include the difference in yield between the treatments (no-till – conventional) (Mg/ha) each year and  
621 historic crop prices at time of harvest (\$/kg). The blue dots and blue line describe accumulated net gain from no-till  
622 over conventionally tilled management. Values were converted from different time periods to present values using  
623 the present value formula:  $PV = FV(1+i)^{-n}$ , where “*PV*” is present value, “*FV*” is future value, “*i*” is interest rate (we  
624 used 5%), and “*n*” is the number of years. The vertical, black dotted line estimates the time at which accumulated  
625 expenses equal accumulated revenue  
626

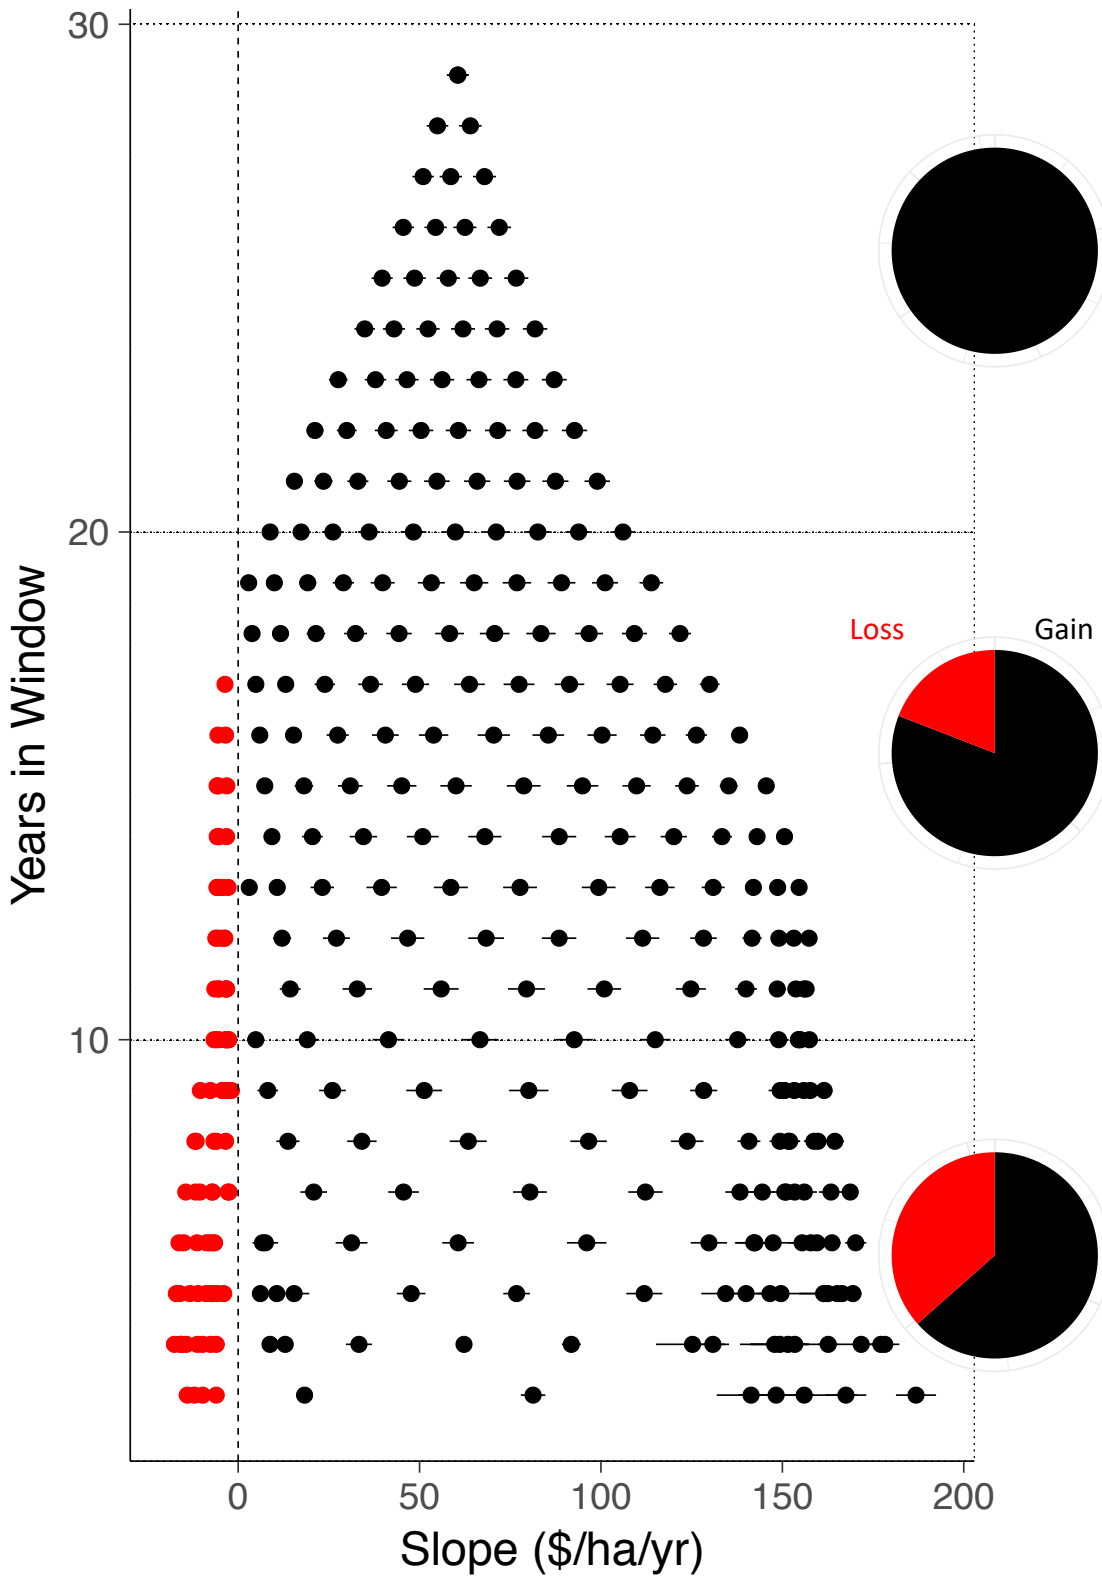

628 Figure 5. Scatterplot showing the relationship between slope (\$/ha/yr) and the number of years in a given window in  
629 terms of accumulated difference between no-till and conventional management (\$/ha). Slopes were determined  
630 using linear mixed effects models using crop (corn, soybean, wheat) and block (1-6) as fixed variables, year as a  
631 random variable, and accumulated gain in no-till over conventional till for each window of time three years in length  
632 or longer, between 1989 and 2017. Only models with statistically significant slopes at the  $\alpha < 0.05$  level are  
633 shown. Dots represent slope and solid lines represent standard error. Positive slopes, shown in black, indicate  
634 accruing gain in relative profitability of continuous no-till management when compared directly to conventionally  
635 managed blocks. Negative slopes, shown in red, indicate accruing loss of no-till management over time when  
636 compared directly to conventionally managed blocks. Pie charts show the percent of trends that are significantly  
637 negative (shown in red) and significantly positive (black) for early windows (0-10 years long, bottom), middle  
638 windows (11-20 years, middle), and long windows (21-29 years, top).

639  
640
